# Supplementary material
Source: PubMed Central journal article supplement (PMC3089898)
Supplement: NIHMS289842-supplement-eFigure.pdf [file NIHMS289842-supplement-eFigure.pdf]

## Monosomy of Chromosome 10 Associated With Dysregulation of Epidermal Growth Factor Signaling in Glioblastomas

Ajay K. Yadav, PhD  
Jaclyn J. Renfrow, MA  
Denise M. Scholtens, PhD  
Hehuang Xie, PhD  
George E. Duran, BS  
Claudia Breidel, PhD  
Hannes Vogel, MD, PhD  
James P. Chandler, MD  
Arnab Chakravarti, MD  
Pierre A. Robe, MD, PhD  
Sunit Das, MD, PhD  
Adrienne C. Scheck, PhD  
John A. Kessler, MD  
Marcelo B. Soares, PhD  
Branimir I. Sikic, MD  
Griffith R. Harsh, MD  
Markus Breidel, MD, PhD

Formatted: Default Paragraph Font

Formatted: Default Paragraph Font

### Suppl eFigure. Methylation Analysis of the ANXA7 Gene Promoter

Pyrosequencing was used to assess the methylation percentage of 9 CpG sites close to the transcriptional start site within the ANXA7 promoter in 59 human gliomas from Stanford University and various control cells. Bar graphs indicate the promoter methylation profile per sample for 9 CpG sites. Dark red lines indicate the average methylation percentage across the samples in each of the graphs. The lowest graph reports the overall promoter methylation profile per sample by averaging the methylation profiles of all 9 CpG sites.

Yadav AK, Renfrow JJ, Scholtens DM, et al. Monosomy of Chromosome 10 Associated With Dysregulation of Epidermal Growth Factor Signaling in Glioblastomas. *JAMA*. 2009;302(3):3joc90051.
